# Supplementary material for: Impact of RSV hospitalization on healthcare costs, caregivers’ productivity loss, and quality of life in children ≤ 2 years old in five European countries
Source: Springer Nature journal article supplement (doi:10.1007/s00431-025-06460-7), 2025-10-25
Supplement: MOESM1 [file 431_2025_6460_MOESM1_ESM.docx]

**Supplementary file**

**Supplemental Table 1. Caregiver’s productivity and daily activity impairment due to child’s RSV hospitalization per country.**

1. **Germany**

|  | Employed caregivers (n=25) | Non-employed caregivers (n=75) |
| --- | --- | --- |
| Caregivers who reported missed hours from work | | Not applicable |
| N (%) | 23/25* (92%) |
| Number of missed hours from work (n=23)1 | |
| Mean ± SD  Median (IQR) | 29.2 ± 16.5  30 (15– 39.5) |
| Work productivity loss score (0-10)2 (n = 15) | |
| Mean ± SD  Median (IQR) | 7.9 ± 2.0   9 (6.5 – 9.5) |
| Daily activity impairment score (0-10)3 (n=25) | | **(n=73)** |
| Mean ± SD  Median (IQR) | 9.1 ± 1.2   9.0 (9 - 10) | 8.7 ± 2.4  10 (8 - 10) |

1. **Spain**

|  | Employed caregivers (n=83) | Non-employed caregivers (n=21) |
| --- | --- | --- |
| Caregivers who reported missed hours from work | | Not applicable |
| N (%) | 37/82* (45%) |
| Number of missed hours from work (n=37)1 | |
| Mean ± SD  Median (IQR) | 31.4 ± 14.9  30 (21– 40) |
| Work productivity loss score (0-10)2 (n=20) | |
| Mean ± SD  Median (IQR) | 7.6 ± 3.4   9 (7 – 10) |
| Daily activity impairment score (0-10)3 (n=75) | | **(n=18)** |
| Mean ± SD  Median (IQR) | 8.3 ± 3.0   10 (8 - 10) | 8.9 ± 1.9  10 (9 - 10) |

1. **France**

|  | Employed caregivers (n=30) | Non-employed caregivers (n=14) |
| --- | --- | --- |
| Caregivers who reported missed hours from work | | Not applicable |
| N (%) | 18/29* (62%) |
| Number of missed hours from work (n=18)1 | |
| Mean ± SD  Median (IQR) | 27.9 ± 14.2  27.5 (16.5– 36) |
| Work productivity loss score (0-10)2 (n=15) | |
| Mean ± SD  Median (IQR) | 7.2 ± 3.5   9 (6 – 9.5) |
| Daily activity impairment score (0-10)3 (n=29) | | **(n=14)** |
| Mean ± SD  Median (IQR) | 8.2± 2.3  9 (8 - 10) | 7.2 ± 3.2  8 (6 - 10) |

1. **Italy**

|  | Employed caregivers (n=50) | Non-employed caregivers (n=50) |
| --- | --- | --- |
| Caregivers who reported missed hours from work | | Not applicable |
| N (%) | 34/50* (68%) |
| Number of missed hours from work (n=34)1 | |
| Mean ± SD  Median (IQR) | 34.5 ± 14.7  36.5 (24– 40) |
| Work productivity loss score (0-10)2 (n=10) | |
| Mean ± SD  Median (IQR) | 8.4 ± 3.1   10 (8 – 10) |
| Daily activity impairment score (0-10)3 (n=50) | | **(n=50)** |
| Mean ± SD  Median (IQR) | 8.7 ± 2.3   10 (8 - 10) | - 1. ± 1.9   10 (8 - 10) |

1. **England**

|  | Employed caregivers (n=23) | Non-employed caregivers (n=3) |
| --- | --- | --- |
| Caregivers who reported missed hours from work | | Not applicable |
| N (%) | 17/23* (74%) |
| Number of missed hours from work (n=17)1 | |
| Mean ± SD  Median (IQR) | 24.8 ± 11.6  23 (16– 30) |
| Work productivity loss score (0-10)2 (n=11) | |
| Mean ± SD  Median (IQR) | 8.9 ± 1.0   9 (8 – 10) |
| Daily activity impairment score (0-10)3 (n=23) | | **(n=2)** |
| Mean ± SD  Median (IQR) | 8.2 ± 2.1   9 (8 – 9.5) | 8.5 ± 2.1   8.5 (7.75 – 9.25) |

SD=standard deviation; IQR=Inter Quartile Range

*number of caregivers who responded to this section of the questionnaire

1Number of missed hours among caregivers who reported missed hours. Only hours missed due to their child’s illness are reported.

2Only completed by caregivers who indicated that they worked during the child’s hospitalization with n=number of caregivers who completed this part of the questionnaire. Loss of productivity related to the child’s hospitalization is measured on a scale from 0 to 10, where 0 indicates that the child’s hospitalization had no effect on their work, and 10 indicates that the child’s hospitalization completely prevented them from working.

3Caregiver’s score indicating how much the child’s hospitalization affected their ability to perform regular daily activities—other than work—on a scale from 0 to 10, where 0 means that the child’s hospitalization had no effect on their regular daily activities, and 10 means that the child’s hospitalization completely prevented them from performing their daily activities. N=number of caregivers who completed this part of the questionnaire.

**Supplemental Figure 1. Country-specific QoL impairment due to RSV hospitalization.**

Scores are displayed as mean difference between RSV associated hospitalization and baseline (± SD).
